# Supplementary material for: The Trisubstituted Isoxazole MMV688766 Exerts Broad-Spectrum Activity against Drug-Resistant Fungal Pathogens through Inhibition of Lipid Homeostasis
Source: PubMed Central journal article supplement (PMC9765174; doi:10.1128/mbio.02730-22), 2022-10-27
Supplement: mbio.02730-22-s0002.pdf [file mbio.02730-22-s0002.pdf]

**A.**

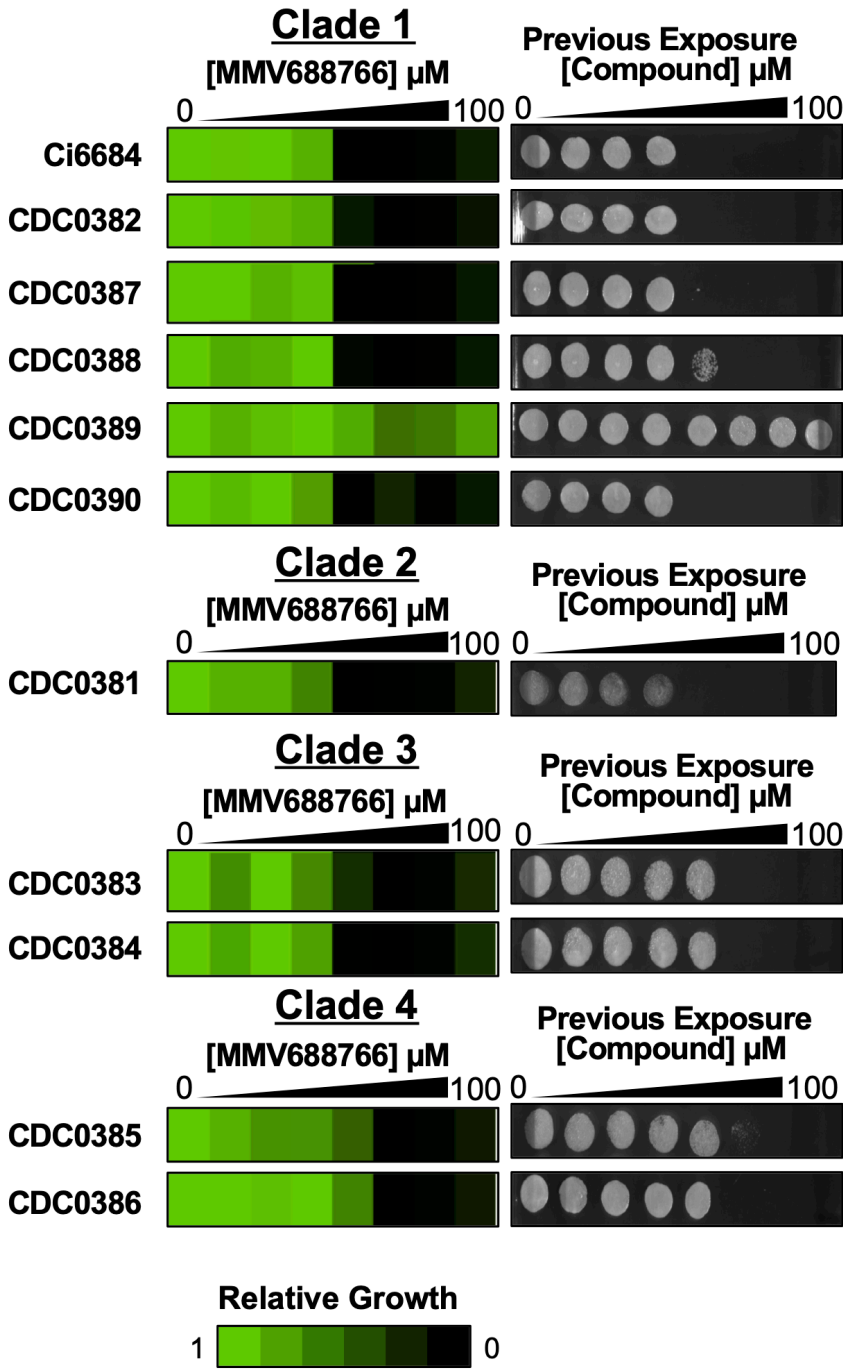

**B.**

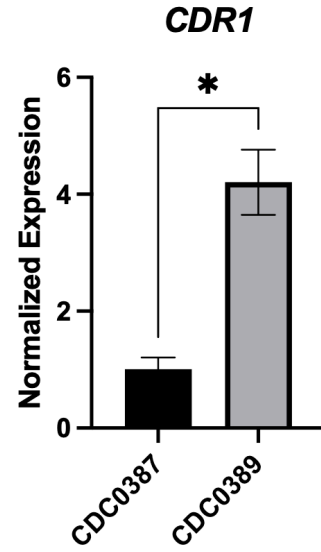

**C.**

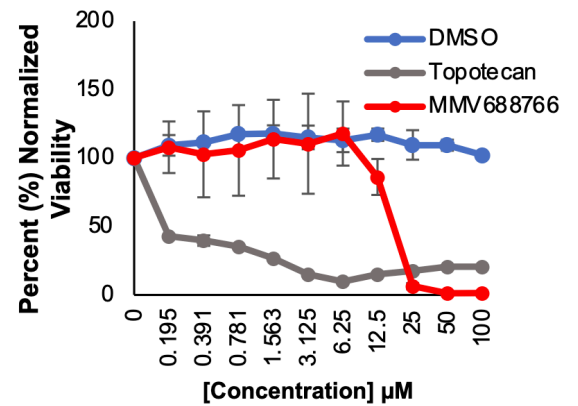

**D.**

| Condition                   | Treatment                  | Mean Percent (%) Survival |        |
|-----------------------------|----------------------------|---------------------------|--------|
|                             |                            | 0 hpi                     | 24 hpi |
| Uninfected                  | -                          | 100                       | 92     |
|                             | 50 $\mu\text{M}$ MMV688766 | 100                       | 0      |
| <i>C. albicans</i> infected | -                          | 100                       | 22.67  |
|                             | 50 $\mu\text{M}$ MMV688766 | 100                       | 0      |
