# Supplementary material for: The Trisubstituted Isoxazole MMV688766 Exerts Broad-Spectrum Activity against Drug-Resistant Fungal Pathogens through Inhibition of Lipid Homeostasis
Source: PubMed Central journal article supplement (PMC9765174; doi:10.1128/mbio.02730-22), 2022-10-27

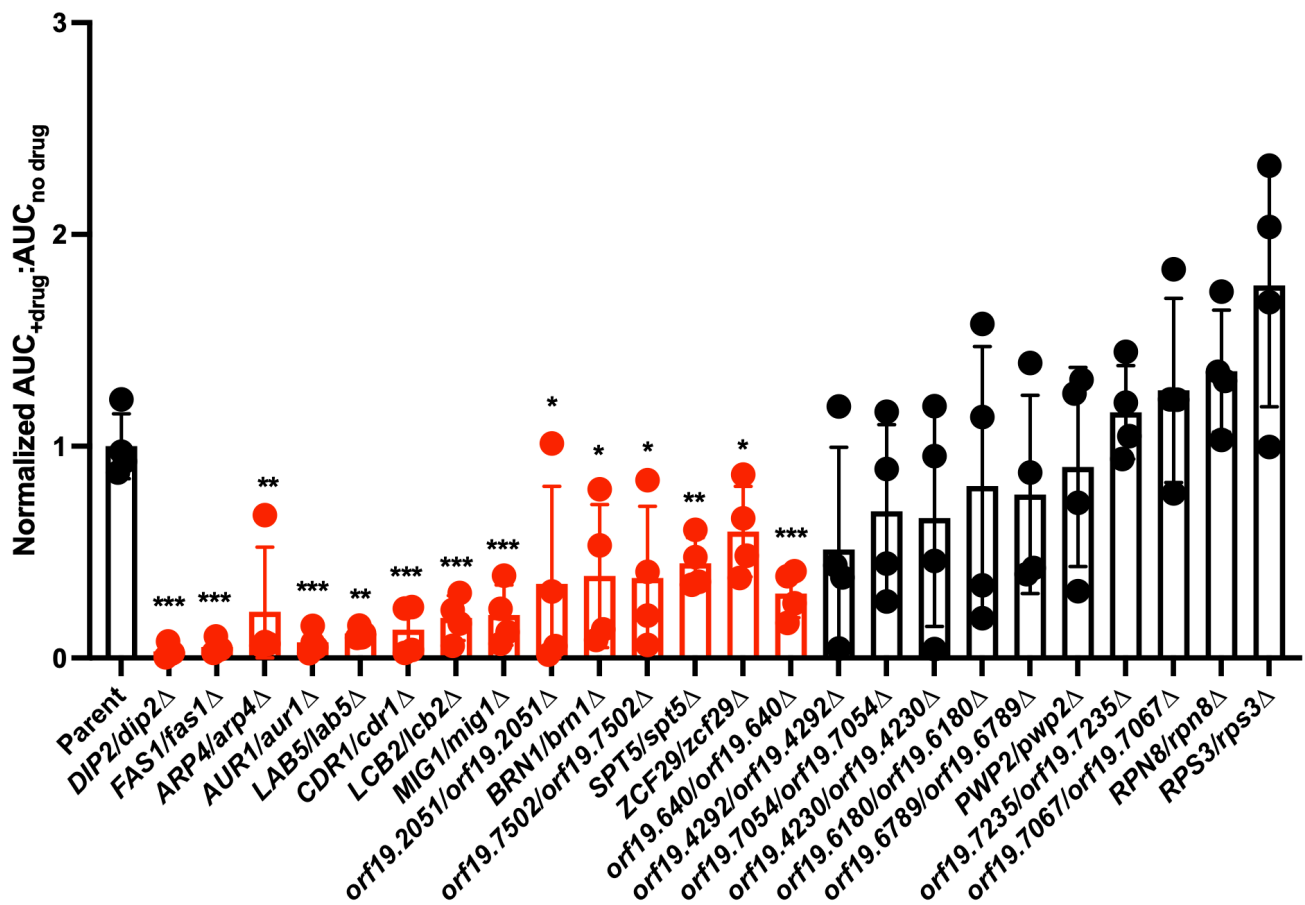

**Response to stress**

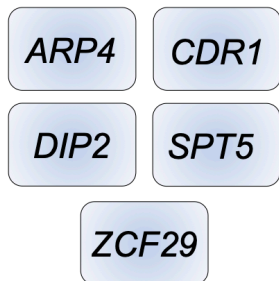

**Organelle organization**

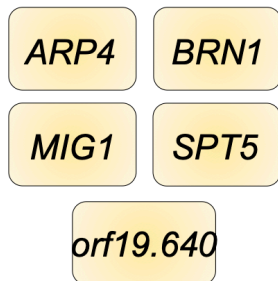

**Lipid metabolic process**

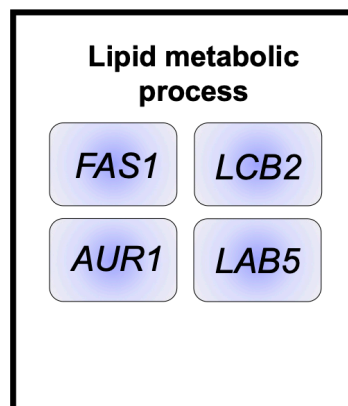

**Biological process unknown**

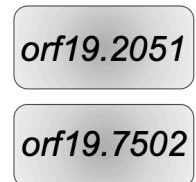

Supplement: mbio.02730-22-s0003.pdf [file mbio.02730-22-s0003.pdf]
