# Supplementary material for: The Trisubstituted Isoxazole MMV688766 Exerts Broad-Spectrum Activity against Drug-Resistant Fungal Pathogens through Inhibition of Lipid Homeostasis
Source: PubMed Central journal article supplement (PMC9765174; doi:10.1128/mbio.02730-22), 2022-10-27
Supplement: mbio.02730-22-s0004.pdf [file mbio.02730-22-s0004.pdf]

**A. *C. auris* (CDC0387)**

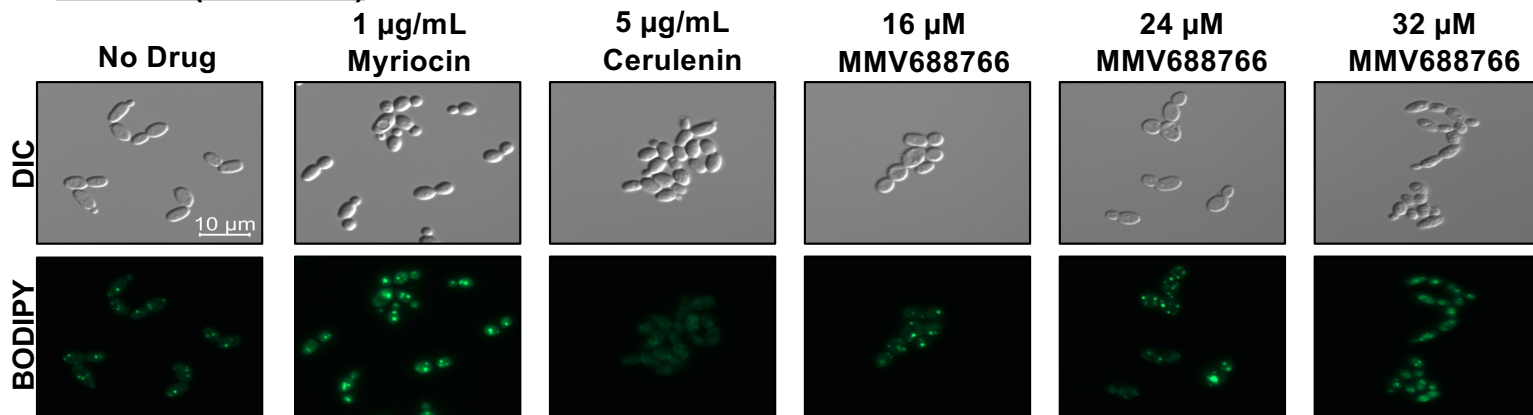

**B. *C. albicans* (CaSS1)**

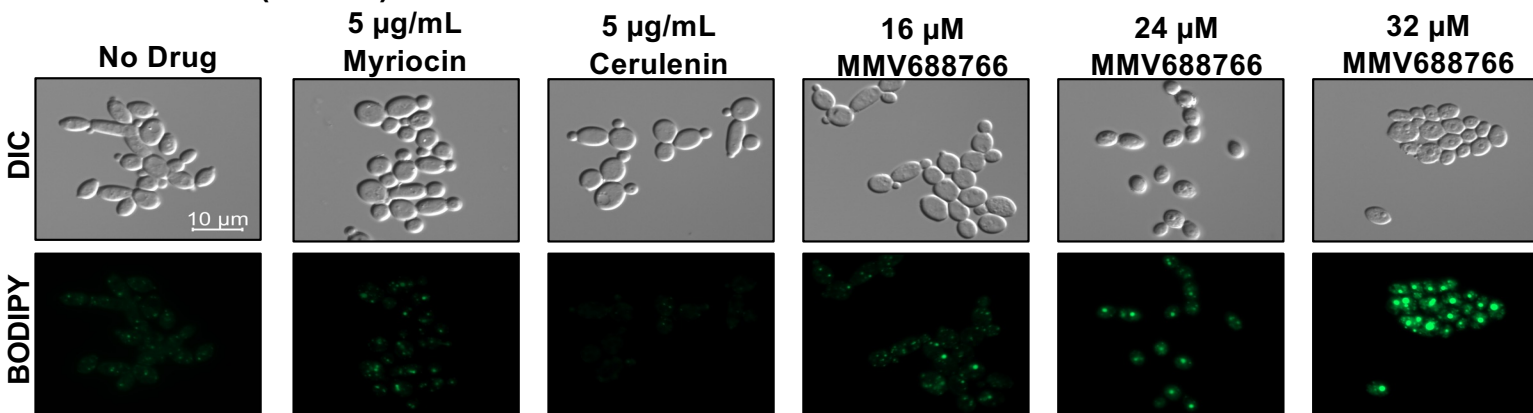

**C. 16ABC Parent**

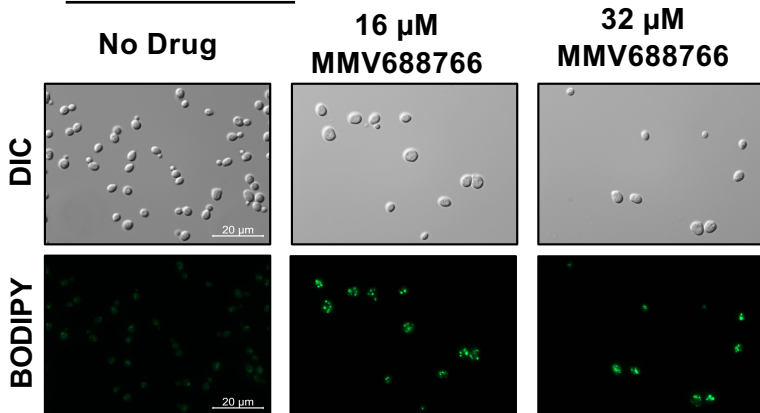

**D. *HAL9*<sup>A1543T</sup> Resistant Mutant**

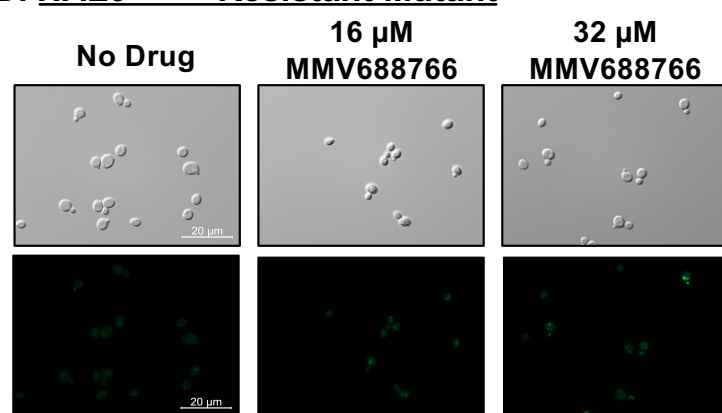

**E.**

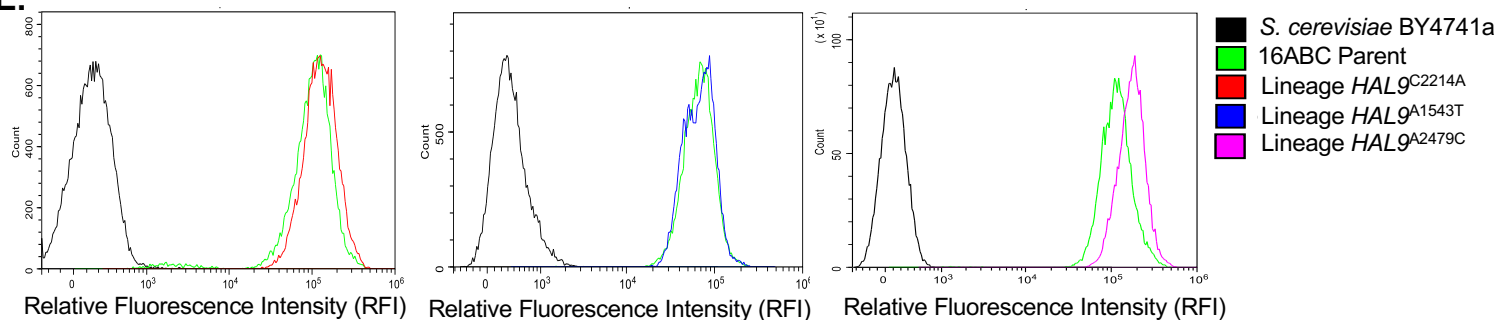

| Strain                                | Events | Mean RFI | Fold-Change RFI |
|---------------------------------------|--------|----------|-----------------|
| BY4741a                               | 20132  | 270.63   | 1               |
| 16ABC                                 | 20221  | 98886.77 | 365.39          |
| Lineage <i>HAL9</i> <sup>C2214A</sup> | 20718  | 122787.0 | 453.70          |
| Lineage <i>HAL9</i> <sup>A1543T</sup> | 21001  | 66623.5  | 246.18          |
| Lineage <i>HAL9</i> <sup>A2479C</sup> | 18223  | 172209.7 | 636.32          |

**Figure S4**
