# Supplementary material for: The Trisubstituted Isoxazole MMV688766 Exerts Broad-Spectrum Activity against Drug-Resistant Fungal Pathogens through Inhibition of Lipid Homeostasis
Source: PubMed Central journal article supplement (PMC9765174; doi:10.1128/mbio.02730-22), 2022-10-27
Supplement: mbio.02730-22-s0007.pdf [file mbio.02730-22-s0007.pdf]

**Table S1: Strains used in this study**

| Strain name                  | Strain ID | Species              | Genotype                                                                                                                                                                     | Source     |
|------------------------------|-----------|----------------------|------------------------------------------------------------------------------------------------------------------------------------------------------------------------------|------------|
| Ci6684                       | CauLC5083 | <i>C. auris</i>      | Clinical isolate                                                                                                                                                             | 1          |
| CDC0381 (B11220)             | CauLC5288 | <i>C. auris</i>      | CDC panel clinical isolate                                                                                                                                                   | 2,3        |
| CDC0382 (B11109)             | CauLC5289 | <i>C. auris</i>      | CDC panel clinical isolate                                                                                                                                                   | 2,3        |
| CDC0383 (B1121)              | CauLC5290 | <i>C. auris</i>      | CDC panel clinical isolate                                                                                                                                                   | 2,3        |
| CDC0384 (B11222)             | CauLC5291 | <i>C. auris</i>      | CDC panel clinical isolate                                                                                                                                                   | 2,3        |
| CDC0385 (B11244)             | CauLC5292 | <i>C. auris</i>      | CDC panel clinical isolate                                                                                                                                                   | 2,3        |
| CDC0386 (B11245)             | CauLC5293 | <i>C. auris</i>      | CDC panel clinical isolate                                                                                                                                                   | 2,3        |
| CDC0387 (B8441)              | CauLC5294 | <i>C. auris</i>      | CDC panel clinical isolate                                                                                                                                                   | 2,3        |
| CDC0388 (B11098)             | CauLC5295 | <i>C. auris</i>      | CDC panel clinical isolate                                                                                                                                                   | 2,3        |
| CDC0389 (B11203)             | CauLC5296 | <i>C. auris</i>      | CDC panel clinical isolate                                                                                                                                                   | 2,3        |
| CDC0390 (B11205)             | CauLC5297 | <i>C. auris</i>      | CDC panel clinical isolate                                                                                                                                                   | 2,3        |
| CaSS1                        | CaLC6106  | <i>C. albicans</i>   | ura3::imm434/ura3::imm434<br>his3::hisG/his3::hisG<br>leu2::tetRGAL4AD-<br>URA/LEU2                                                                                          | 4,5        |
| SN95                         | CaLC239   | <i>C. albicans</i>   | arg4Δ/arg4Δ his1Δ/his1Δ<br>URA3/ura3Δ::imm434<br>IRO1/iro1Δ::imm434                                                                                                          | 6          |
| BG2                          | CgLC1002  | <i>C. glabrata</i>   | Wild type <i>C. glabrata</i>                                                                                                                                                 | 7          |
| H99                          | CnLC3142  | <i>C. neoformans</i> | Wild type <i>C. neoformans</i>                                                                                                                                               | 8          |
| Af239                        | AfLC3669  | <i>A. fumigatus</i>  | Wild type <i>A. fumigatus</i>                                                                                                                                                | 9          |
| BJ2168 3xFLAG-<br>FAS1       | JWL01     | <i>S. cerevisiae</i> | leu2Δ trp1Δ ura3-52 prb1-<br>1122 pep4-3 prc1-407 gal2Δ<br>FAS1-3xFLAG                                                                                                       | 10         |
| SN95 6HIS3xFLAG-<br>FAS1     | CaLC5425  | <i>C. albicans</i>   | arg4Δ/arg4Δ his1Δ/his1Δ<br>FAS1-6HIS3xFLAG<br>HIS1/fas1Δ                                                                                                                     | 10         |
| BY4741a                      | ScLC151   | <i>S. cerevisiae</i> | his3Δ leu2Δ met15Δ ura3Δ                                                                                                                                                     | 11         |
| 16ABC                        | ScLC2336  | <i>S. cerevisiae</i> | adp1Δ snq2Δ ycf1Δ pdr15Δ<br>yor1Δ vmr1Δ pdr11Δ nft1Δ<br>bpt1Δ ybt1Δ ynr070wΔ<br>yol075cΔ aus1Δ pdr5Δ<br>pdr10Δ pdr12Δ<br>can1Δ::GMTToolkit-a his3Δ1<br>leu2Δ0 ura3Δ0 met15Δ0 | 12         |
| 16ABC HAL9 <sup>C2214A</sup> | ScLC7775  | <i>S. cerevisiae</i> | As ScLC2336, HAL9 <sup>C2214A</sup>                                                                                                                                          | This study |
| 16ABC HAL9 <sup>A1543T</sup> | ScLC7776  | <i>S. cerevisiae</i> | As ScLC2336, HAL9 <sup>A1543T</sup>                                                                                                                                          | This study |
| 16ABC HAL9 <sup>A2479T</sup> | ScLC7777  | <i>S. cerevisiae</i> | As ScLC2336, HAL9 <sup>A2479T</sup>                                                                                                                                          | This study |
| BY4741a hal9Δ                | ScLC7861  | <i>S. cerevisiae</i> | As ScLC151, HAL9::HYGB                                                                                                                                                       | This study |

|                                                                           |          |                      |                                                              |            |
|---------------------------------------------------------------------------|----------|----------------------|--------------------------------------------------------------|------------|
| 16ABC <i>hal9</i> Δ                                                       | ScLC7862 | <i>S. cerevisiae</i> | As ScLC2336,<br><i>HAL9::HYGB</i>                            | This study |
| 16ABC <i>hal9</i> <sup>A1543T</sup> Δ                                     | ScLC7863 | <i>S. cerevisiae</i> | As ScLC2336,<br><i>HAL9</i> <sup>A1543T</sup> :: <i>HYGB</i> | This study |
| 16ABC <i>hal9</i> Δ +<br><i>pHAL9</i>                                     | ScLC7937 | <i>S. cerevisiae</i> | As ScLC7862 + pLC1543<br>( <i>LEU2</i> )                     | This study |
| 16ABC <i>hal9</i> Δ +<br><i>pHAL9</i> <sup>C2214A</sup>                   | ScLC7938 | <i>S. cerevisiae</i> | As ScLC7862 + pLC1544<br>( <i>LEU2</i> )                     | This study |
| 16ABC <i>hal9</i> Δ +<br><i>pHAL9</i> <sup>A1543T</sup>                   | ScLC7939 | <i>S. cerevisiae</i> | As ScLC7862 + pLC1545<br>( <i>LEU2</i> )                     | This study |
| 16ABC <i>hal9</i> Δ +<br><i>HAL9</i> <sup>A2479T</sup>                    | ScLC7940 | <i>S. cerevisiae</i> | As ScLC7862 + pLC1546<br>( <i>LEU2</i> )                     | This study |
| 16ABC <i>hal9</i> <sup>A1543T</sup> Δ +<br><i>pHAL9</i>                   | ScLC7941 | <i>S. cerevisiae</i> | As ScLC7863 + pLC1543<br>( <i>LEU2</i> )                     | This study |
| 16ABC <i>hal9</i> <sup>A1543T</sup> Δ +<br><i>pHAL9</i> <sup>C2214A</sup> | ScLC7942 | <i>S. cerevisiae</i> | As ScLC7863 + pLC1544<br>( <i>LEU2</i> )                     | This study |
| 16ABC <i>hal9</i> <sup>A1543T</sup> Δ +<br><i>pHAL9</i> <sup>A1543T</sup> | ScLC7943 | <i>S. cerevisiae</i> | As ScLC7863 + pLC1545<br>( <i>LEU2</i> )                     | This study |
| 16ABC <i>hal9</i> <sup>A1543T</sup> Δ +<br><i>HAL9</i> <sup>A2479T</sup>  | ScLC7944 | <i>S. cerevisiae</i> | As ScLC7863 + pLC1546<br>( <i>LEU2</i> )                     | This study |
| BY4741a<br><i>HSP12::HygB</i>                                             | ScLC8331 | <i>S. cerevisiae</i> | As ScLC151,<br><i>HSP12::HYGB</i>                            | This study |
| BY4741a<br><i>MSN2::LEU2</i>                                              | ScLC8332 | <i>S. cerevisiae</i> | As ScLC151, <i>MSN2::LEU2</i>                                | This study |
| BY4741a<br><i>MSN4::HygB</i>                                              | ScLC8333 | <i>S. cerevisiae</i> | As ScLC151, <i>MSN4::HYGB</i>                                | This study |
| 16ABC <i>hsp12</i> Δ                                                      | ScLC8334 | <i>S. cerevisiae</i> | As ScLC2336,<br><i>HSP12::HygB</i>                           | This study |
| <i>HAL9</i> <sup>A1543T</sup> <i>hsp12</i> Δ                              | ScLC8335 | <i>S. cerevisiae</i> | As ScLC7776,<br><i>HSP12::HygB</i>                           | This study |
| 16ABC <i>msn2</i> Δ                                                       | ScLC8336 | <i>S. cerevisiae</i> | As ScLC2336, <i>MSN2::LEU2</i>                               | This study |
| <i>HAL9</i> <sup>A1543T</sup> <i>msn2</i> Δ                               | ScLC8337 | <i>S. cerevisiae</i> | As ScLC2336, <i>MSN2::LEU2</i>                               | This study |
| 16ABC <i>msn4</i> Δ                                                       | ScLC8338 | <i>S. cerevisiae</i> | As ScLC2336, <i>MSN4::HygB</i>                               | This study |
| <i>HAL9</i> <sup>A1543T</sup> <i>msn4</i> Δ                               | ScLC8339 | <i>S. cerevisiae</i> | As ScLC2336, <i>MSN4::HygB</i>                               | This study |
| 16ABC <i>msn2</i> Δ <i>msn4</i> Δ                                         | ScLC8340 | <i>S. cerevisiae</i> | As ScLC2336, <i>MSN2::LEU2</i><br><i>MSN4::HygB</i>          | This study |
| <i>HAL9</i> <sup>A1543T</sup><br><i>msn2</i> Δ <i>msn4</i> Δ              | ScLC8341 | <i>S. cerevisiae</i> | As ScLC7776, <i>MSN2::LEU2</i><br><i>MSN4::HygB</i>          | This study |
| 16ABC <i>pHSP12</i> <sup>OE</sup>                                         | ScLC8341 | <i>S. cerevisiae</i> | As ScLC2336 + pLC1609<br>( <i>LEU2</i> )                     | This study |

## References

1. Chatterjee S, Alampalli SV, Nageshan RK, Chettiar ST, Joshi S, Tatu US. Draft genome of a commonly misdiagnosed multidrug resistant pathogen *Candida auris*. *BMC Genomics*. 2015;16(1):1-16. doi:10.1186/s12864-015-1863-z
2. Lockhart SR, Etienne KA, Vallabhaneni S, et al. Simultaneous emergence of multidrug-resistant *Candida auris* on 3 continents confirmed by whole-genome sequencing and epidemiological analyses. *Clin Infect Dis*. 2017;64(2):134-140. doi:10.1093/cid/ciw691
3. CDC & FDA Antibiotic Resistance Isolate Bank. Atlanta (GA):CDC (2020).
4. Roemer T, Jiang B, Davison J, et al. Large-scale essential gene identification in *Candida albicans* and applications to antifungal drug discovery. *Mol Microbiol*. 2003;50(1):167-181. doi:10.1046/j.1365-2958.2003.03697.x
5. Fu C, Zhang X, Veri AO, et al. Leveraging machine learning essentiality predictions and chemogenomic interactions to identify antifungal targets. *Nat Commun*. 2021;12(1):1-18. doi:10.1038/s41467-021-26850-3
6. Noble SM, Johnson AD. Strains and strategies for large-scale gene deletion studies of the diploid human fungal pathogen *Candida albicans*. *Eukaryot Cell*. 2005;4(2):298-309. doi:10.1128/EC.4.2.298-309.2005
7. Fidel PL, Cutright JL, Tait L, Sobel JD. A murine model of *Candida glabrata* vaginitis. *J Infect Dis*. 1996;173(2):425-431. doi:10.1093/infdis/173.2.425
8. Granger DL, Perfect JR, Durack DT. Virulence of *Cryptococcus neoformans*: Regulation of capsule synthesis by carbon dioxide. *J Clin Invest*. 1985;76(2):508-516. doi:10.1172/JCI112000
9. Nierman WC, Pain A, Anderson MJ, et al. Genomic sequence of the pathogenic and allergenic filamentous fungus *Aspergillus fumigatus*. *Nature*. 2005;438(7071):1151-1156. doi:10.1038/nature04332
10. Lou JW, Iyer KR, Hasan SMN, Cowen LE, Mazhab-Jafari MT. Electron cryomicroscopy observation of acyl carrier protein translocation in type I fungal fatty acid synthase. *Sci Rep*. 2019;9(1):1-8. doi:10.1038/s41598-019-49261-3
11. Giaever G, Chu AM, Ni L, et al. Functional profiling of the *Saccharomyces cerevisiae* genome. *Nature*. 2002;418(6896):387-391. doi:10.1038/nature00935
12. Suzuki Y, Onge RPS, Mani R, et al. Knocking out multigene redundancies via cycles of sexual assortment and fluorescence selection. *Nat Methods*. 2011;8(2):159-164. doi:10.1038/nmeth.1550
