# Supplementary material for: The Trisubstituted Isoxazole MMV688766 Exerts Broad-Spectrum Activity against Drug-Resistant Fungal Pathogens through Inhibition of Lipid Homeostasis
Source: PubMed Central journal article supplement (PMC9765174; doi:10.1128/mbio.02730-22), 2022-10-27
Supplement: mbio.02730-22-s0008.pdf [file mbio.02730-22-s0008.pdf]

**Table S2: Plasmids used in this study**

| <b>Plasmid number</b> | <b>Description</b>                                           | <b>Source</b> |
|-----------------------|--------------------------------------------------------------|---------------|
| pLC3                  | ampR, HYGB                                                   | 1,2           |
| pLC136                | ampR, <i>GPD1p</i> , <i>CYC1t</i> , <i>LEU2</i> (p415GPD)    | 3             |
| pLC1543               | <i>GPD1p-HAL9-CYCt</i> (ampR, <i>LEU2</i> )                  | This study    |
| pLC1544               | <i>GPD1p-HAL9<sup>C2214A</sup>-CYCt</i> (ampR, <i>LEU2</i> ) | This study    |
| pLC1545               | <i>GPD1p-HAL9<sup>A1543T</sup>-CYCt</i> (ampR, <i>LEU2</i> ) | This study    |
| pLC1546               | <i>GPD1p-HAL9<sup>A2479C</sup>-CYCt</i> (ampR, <i>LEU2</i> ) | This study    |
| pLC1609               | <i>GPD1p-HSP12-CYCt</i> (ampR, <i>LEU2</i> )                 | This study    |

**References**

1. Wach A, Brachat A, Pöhlmann R, Philippsen P. New heterologous modules for classical or PCR-based gene disruptions in *Saccharomyces cerevisiae*. *Yeast*. 1994;10(13):1793-1808. doi:10.1002/yea.320101310
2. Goldstein AL, McCusker JH. Three new dominant drug resistance cassettes for gene disruption in *Saccharomyces cerevisiae*. *Yeast*. 1999;15(14):1541-1553. doi:10.1002/(SICI)1097-0061(199910)15:14<1541::AID-YEA476>3.0.CO;2-K
3. Mumberg D, Müller R, Funk M. Yeast vectors for the controlled expression of heterologous proteins in different genetic backgrounds. *Gene*. 1995;156(1):119-122. doi:https://doi.org/10.1016/0378-1119(95)00037-7
