# Supplementary material for: The Trisubstituted Isoxazole MMV688766 Exerts Broad-Spectrum Activity against Drug-Resistant Fungal Pathogens through Inhibition of Lipid Homeostasis
Source: PubMed Central journal article supplement (PMC9765174; doi:10.1128/mbio.02730-22), 2022-10-27
Supplement: mbio.02730-22-s0009.pdf [file mbio.02730-22-s0009.pdf]

**Table S3: Oligonucleotides used in this study**

| <b>Primer name</b>                               | <b>Description</b>                        | <b>Sequence</b>                                                                                      |
|--------------------------------------------------|-------------------------------------------|------------------------------------------------------------------------------------------------------|
| UP-TAG universal amplification primer            | For HIP                                   | AATGATACGGCGACCACCGAGATCTACACCGA<br>GGTCGAGAATGATGTCCACGAGGTCTCT                                     |
| DOWN-TAG universal amplification primer          | For HIP                                   | AATGATACGGCGACCACCGAGATCTACACCAC<br>ATGATATGTTGAGCGGTGTCGGTCTCGTAG                                   |
| UP-TAG index amplification primer <sup>1</sup>   | For HIP                                   | CAAGCAGAAGACGGCATAACGAGATNNNNNNG<br>CCATTTGTCTGTCGACCTGCAGCGTACG                                     |
| DOWN-TAG index amplification primer <sup>1</sup> | For HIP                                   | CAAGCAGAAGACGGCATAACGAGATNNNNNNG<br>AGTATCTGTATCTGGCCGAGCTCGAATTCATC<br>GA                           |
| UP-TAG sequencing primer                         | For HIP                                   | CGAGGTTCGAGAATGATGTCCACGAGGTCTCT                                                                     |
| DOWN-TAG sequencing primer                       | For HIP                                   | CACATGATATGTTGAGCGGTGTCGGTCTCGTA<br>G                                                                |
| UP-TAG index sequencing primer                   | For HIP                                   | CGTACGCTGCAGGTTCGACAGACAAATGGC                                                                       |
| DOWN-TAG index sequencing primer                 | For HIP                                   | ATCGATGAATTCGAGCTCGGCCAGATACAGAT<br>ACTC                                                             |
| oLC9947                                          | <i>ScHAL9_orf_1947_C2</i><br>214A-Amp-Fwd | CAATTGGAGAGACAACTTGC                                                                                 |
| oLC9948                                          | <i>ScHAL9_orf_2451_C2</i><br>214A-Amp-Rev | GACATTGTCAAACAGTAACTGC                                                                               |
| oLC9951                                          | <i>ScHAL9_orf_1261_A1</i><br>543T-Amp-Fwd | GCCACTCAATCAATTATAAGAGG                                                                              |
| oLC9952                                          | <i>ScHAL9_orf_1912_A1</i><br>543T-Amp-Rev | GCATGGCATCGAATGAAAG                                                                                  |
| oLC9955                                          | <i>ScHAL9_orf_2242_A2</i><br>479T-Amp-Fwd | CTGTTTCAAGGCATCAATTACC                                                                               |
| oLC9956                                          | <i>ScHAL9_orf_2751_A2</i><br>479T-Amp-Rev | GTTTATTGGTGCTTCCTCCG                                                                                 |
| oLC9949                                          | <i>ScHAL9_orf_2007_C2</i><br>214A-Seq-Fwd | GGTACTTTACGCTCAAAAATCC                                                                               |
| oLC9950                                          | <i>ScHAL9_orf_2383_C2</i><br>214A-Seq-Rev | CGATGATCTCTTTTACCTCACC                                                                               |
| oLC9953                                          | <i>ScHAL9_orf_1350_A1</i><br>543T-Seq-Fwd | CGTTGCCTTACTAAATGCCA                                                                                 |
| oLC9954                                          | <i>ScHAL9_orf_1783_A1</i><br>543T-Seq-Rev | CAACTACATTCAATGCAGAGTTG                                                                              |
| oLC9957                                          | <i>ScHAL9_orf_2343_A2</i><br>479T-Seq-Fwd | GAACGATCTAAAAAAGAAAGGTGAGG                                                                           |
| oLC9958                                          | <i>ScHAL9_orf_2668_A2</i><br>479T-Seq-Rev | CCTTTTGTAAAGAATGGAGAGAACC                                                                            |
| oLC9974                                          | HygB+70bp 5' UTR<br><i>ScHAL9</i>         | AGCTTATTATCGTACTTTAATTCAACTTAGGAA<br>ATCAGCACTCTCCACTCCAAATCTTCGGTTTGA<br>AATAACATGGAGGCCCAAGAAATACC |

|           |                                                |                                                                                                         |
|-----------|------------------------------------------------|---------------------------------------------------------------------------------------------------------|
| oLC9975   | HygB+70bp 3' UTR<br><i>ScHAL9</i>              | CAAATAGTACATATAATATGCATTGGGAAAGA<br>ATTTTTATTTTTTACAATCTTTGTAGACAAGGT<br>ACAGTCAGTATAGCGACCAGCATTTC     |
| oLC10k69  | <i>ScHAL9</i> -245bp Fwd                       | AAGGTCTACCACATGTGTTTTGAAT                                                                               |
| oLC10k70  | <i>ScHAL9</i> +255bp Rev                       | GTTTACATGACCCAAGCAAAATTAC                                                                               |
| oLC9980   | <i>ScHAL9</i> +1Fwd-SpeI                       | CGCTACTAGTATGGAAAATCAA<br>GGTGGAGATTACAGC                                                               |
| oLC9981   | <i>ScHAL9</i> +3093Rev-<br>BamHI               | CGCTGGATCCTTATTCATAATCC<br>CTAAAAGTGTTTCACG                                                             |
| oLC10k90  | <i>ScHAL9</i> +1Fwd-<br>BamHI                  | CGCTGGATCCATGGAAAATCAA<br>GGTGGAGATTACAGC                                                               |
| oLC10k91  | <i>ScHAL9</i> +3093R-PstI                      | CGCTCTGCAGTTATTCATAATCC<br>CTAAAAGTGTTTCACG                                                             |
| oLC10k165 | <i>ScHAL9</i> _UpIntHygB-<br>392 Fwd           | CGAATACCGACTACAGACGG                                                                                    |
| oLC59     | HPH-R                                          | CAGAAACTTCTCGACAGACG                                                                                    |
| oLC60     | HPH-F                                          | CTCGTCCGAGGGCAAAGG                                                                                      |
| oLC10k166 | <i>ScHAL9</i> _DnHygB+39<br>7 Rev              | CGTAAAGCCAATGAATTGGACG                                                                                  |
| oLC1604   | pLC136 GPD Fwd                                 | TATTGTTTTCTTCACCAACC                                                                                    |
| oLC9983   | <i>ScHAL9</i> orf 133-Rev                      | GAGTTTCAGGAACCAGACG                                                                                     |
| oLC883    | pLC136 CYC1 Rev                                | GCGTGAATGTAAGCGTGAC                                                                                     |
| oLC9982   | <i>ScHAL9</i> _orf_3010-<br>Fwd                | GCTTTTAGAGCCTTATTGCC                                                                                    |
| oLC386    | <i>CmLEU2</i> -B                               | CAGAACCAGAACTCAATGC                                                                                     |
| oLC387    | <i>CmLEU2</i> -C                               | TACAAAATGAACACCACC                                                                                      |
| oLC10k455 | oLC1138+70bp 5UTR<br><i>ScMSN4::HygB</i> pLC3  | TCCTTTTTGAATATTTAACGCCTTATCAGTTC<br>GGCTTTTTTTTCTTTTCTTCTTATTA AAAACAAT<br>ATAACATGGAGGCCCAGAATACC      |
| oLC10k456 | oLC1139+70bp 3UTR<br><i>ScMSN4::HygB</i> pLC3  | ATATTATTTCTCCGAAAACCTGTCATACCGTAG<br>CTTGTCTTGCTTTTATTTGCTTTTGACCTTATT<br>TTTCAGTATAGCGACCAGCATTTC      |
| oLC10k457 | <i>ScMSN2::LEU2</i> 70bp<br>5UTR pLC43         | TTGGTTTTATTGCTTTATTTTTTCTTTCTTTTT<br>CAACTTTTATTGCTCATAGAAGAACTAGATCT<br>AAAGCTATGCATCAAGCTTGG          |
| oLC10k458 | <i>ScMSN2::LEU2</i> 70bp<br>3UTR pLC43         | AAGCTTCATAAGTCATTGAACAGAATTATCTT<br>ATGAAGAAAGATCTATCGAATTA AAAAAAATG<br>GGGTCTACCTCTAGATGCATGCTCG      |
| oLC10k459 | oLC1138+70bp 5UTR<br><i>ScHSP12::HygB</i> pLC3 | TATAGAAAAAAAACCATCTGATTATTCGATA<br>ATCTCAAACAACAACCTCAAACA AAAAAAAA<br>CTAAATACAACAACATGGAGGCCCAGAATACC |
| oLC10k460 | oLC1139+70bp 3UTR<br><i>ScHSP12::HygB</i> pLC3 | CATTGAATATAATATTAAGGAACATCACACAT<br>CATAAAGAAAAAACCATGTA ACTACAAAGAG<br>TTCCGAAAGACAGTATAGCGACCAGCATTTC |
| oLC10k467 | <i>ScMSN4</i> -267bp Fwd                       | GCATGAGCATACTGTAGG                                                                                      |
| oLC10k468 | <i>ScMSN4</i> +118bp Rev                       | CCGAATGAAATGACCAACC                                                                                     |
| oLC10k469 | <i>ScMSN2</i> -224bp Fwd                       | AACAGACGGAAACCTTGG                                                                                      |
| oLC10k470 | <i>ScMSN2</i> +171bp+Rev                       | CGTGTATCTAAGTTGTTACAGGC                                                                                 |
| oLC10k471 | <i>ScHSP12</i> -220bp Fwd                      | CGTTTGGTCAACTTTGAGG                                                                                     |
| oLC10k472 | <i>ScHSP12</i> +126bp Rev                      | CCACCTCGATTTAAGCGT                                                                                      |

|           |                              |                                       |
|-----------|------------------------------|---------------------------------------|
| oLC10k461 | <i>ScMSN4</i> -307bp Fwd     | CCTTCTACCCTCTTGATGC                   |
| oLC10k462 | <i>ScMSN4</i> +294bp Rev     | CGTAAAACCAGAACGTGC                    |
| oLC10k463 | <i>ScMSN2</i> -313bp Fwd     | GGTAATAGTAAGAAAGCAGCACG               |
| oLC10k464 | <i>ScMSN2</i> +373bp Rev     | CGATTTTCAAACCTGACAGGC                 |
| oLC10k465 | <i>ScHSP12</i> -312bp Fwd    | GGAAAGGTATACGCAAGC                    |
| oLC10k466 | <i>ScHSP12</i> +293bp Rev    | GCAACCGCCATGTTTAAGC                   |
| oLC10k495 | <i>ScHSP12</i> -387bp Fwd    | CGTAGTAAAGAGGGGAAAAGG                 |
| oLC10k496 | <i>ScHSP12</i> +372bp Rev    | GGATTTTCATGAAAATCTCGGC                |
| oLC10k497 | <i>ScMSN2</i> -451bp Fwd     | GTTTCCAGCGAAAGAGACAGG                 |
| oLC10k498 | <i>ScMSN2</i> +569bp Rev     | CATTGAAGCCCTCTTCATCC                  |
| oLC10k499 | <i>ScMSN4</i> -458bp Fwd     | GAAAACCCGAGCTAGAACTAGG                |
| oLC10k500 | <i>ScMSN4</i> +461bp Rev     | CCAATCCTTGAATGCTTCCC                  |
| oLC805    | GPDPro F p426GPD             | CGGTAGGTATTGATTGTAATTCTG              |
| oLC10k491 | <i>ScHSP12</i> +1_BamHI Fwd  | CGCTGGATCCATGTCTGACGCAGGTAGAAAA<br>GG |
| oLC10k492 | <i>ScHSP12</i> +330_Sall Rev | CGCTGTCGACTTACTTCTTGGTTGGGTCTTC       |
| oLC10k493 | <i>ScHSP12</i> orf 77-Rev    | GCGTATGACTTTTGAGAGTC                  |
| oLC10k494 | <i>ScHSP12</i> _orf_253-Fwd  | GCCAAGTCCAAGTTGAACG                   |
| oLC10k338 | <i>ScHAL9</i> RT Fwd         | GTATTAGCAATCCTGTAGCG                  |
| oLC10k339 | <i>ScHAL9</i> RT Rev         | CCAATAACCACTCAAGTCTAGC                |
| oLC10k344 | <i>ScACT1</i> RT Fwd         | CCTTCTACGTTTCCATCCAAGC                |
| oLC10k345 | <i>ScACT1</i> RT Rev         | GCAGTGGTGGAGAAAGAGTAACC               |
| oLC10k346 | <i>ScENAI</i> RT Fwd         | GGTGACCCAACAGAAATTGC                  |
| oLC10k347 | <i>ScENAI</i> RT Rev         | GCTTCACAGTTGAGTCGAATG                 |
| oLC10k352 | <i>ScHSP12</i> RT Fwd        | GGAATACATCACTGACAAGGC                 |
| oLC10k353 | <i>ScHSP12</i> RT Rev        | GGCTCCCATGTAATCTCTAGC                 |
| oLC10k551 | <i>ScALG9</i> RT Fwd         | CACGGATAGTGGCTTTGGTGAACAATTAC         |
| oLC10k552 | <i>ScALG9</i> RT Rev         | TATGATTATCTGGCAGCAGGAAAGAACTTGG       |
| oLC10k553 | <i>ScTAF10</i> RT Fwd        | ATATTCCAGGATCAGGTCTTCCGTAGC           |
| oLC10k554 | <i>ScTAF10</i> RT Rev        | GTAGTCTTCTCATTCTGTTGATGTTGTTGTTG      |
| oLC10k555 | <i>ScUBC6</i> RT Fwd         | GATACTTGGAATCCTGGCTGGTCTGTCTC         |
| oLC10k556 | <i>ScUBC</i> RT Rev          | AAAGGGTCTTCTGTTTCATCACCTGTATTTGC      |
| oLC5727   | <i>CaurisACT1</i> +121F      | ACCCAAGTCCAACAGAGAG                   |
| oLC5728   | <i>CaurisACT1</i> +316R      | TCCAGCCAAGTCAAGTCTCA                  |
| oLC5729   | <i>CaurisGPD1</i> +141F      | ATCCTTGCTGAAAACGCTGC                  |
| oLC5730   | <i>CaurisGPD1</i> +318R      | TCCTCGGCCACCTTTACAAT                  |
| oLC10k907 | <i>CaurHSP12</i> RT Fwd      | GGAGGTTGTTACTGACAAGGTC                |
| oLC10k908 | <i>CaurHSP12</i> RT Rev      | CCTCAAGGTACTCCTGAGC                   |

<sup>1</sup> For DMSO solvent triplicates NNNNNN = ATCAG, CGATGT, and TTAGGC, for MMV688766-treated triplicates NNNNNN = CAGATC, ACTTGA, and GATCAG.
